# Supplementary material for: Promoter Hypermethylation and Decreased Expression of Syncytin-1 in Pancreatic Adenocarcinomas
Source: PubMed Central journal article supplement (PMC4521816; doi:10.1371/journal.pone.0134412), 2015-07-31
Supplement: pone.0134412.s003.pdf [file pone.0134412.s003.pdf]

## Original DNA sequence for Cobra and Sequence Assay (5'-3')

ATACTCTCTGGAGAGTGAATTACTGAGTCACATGATCTTCACTGCAGTCA  
TTTGTGGCTATGTGACATAGTTCTGGACAGTGAACATAGACAGAAGTCCCTGGGGCGGGC  
TTCTTTCTGGGATGAGGGCAAAACGGCCTGGAGATACAGCAATTATCTTGCAACTGAGAG  
ACAGGACTAGCTGGATTTCTAGGCCGACTAAGAATCCCTAAGCCTAGCTGGGAAGGTGA  
CCACGTCCACCTTTAAACACGGGGCTTGCAACTTAGCTCACACCTGACCAATCAGAGAGC  
TCACTAAAATGCTAATTAGGCAAAGACAGGAGGTAAAGAAATAGCCAATCATCTATTGCC  
TGAGAGCACAGCAGGAGGGACAACAATCGGGATATAAACCCAGGCATTCGAGCTGGCAAC  
AGCAGCCCCCTTTGGGTCCCTTCCCTTTGTATGGGAGCTGTTTT

## Convert all C to T

ATATTTTTTGGAGAGTGAATTATTGAGTTATATGATTTTTATTGTAGTTA  
TTTGTGGTTATGTGATATAGTTTTGGATAGTGAATATAGATAGAAGTTTTTGGGGTGGGT  
TTTTTTTTTGGGATGAGGGTAAAATGTTTGGAGATATAGTAATTATTTTGTAAATTGAGAG  
ATAGGATTAGTTGGATTTTTTAGGTTGATTAAGAATTTTTAAGTTTAGTTGGGAAGGTGA  
TTATGTTTATTTTTAAATATGGGGTTTGTATTTAGTTTATATTTGATTAATTAGAGAGT  
TTATTTAAATGTTAATTAGGTAAAGATAGGAGGTAAAGAAATAGTTAATTATTTATTGTT  
TGAGAGTATAGTAGGAGGGATAATAATTGGGATATAAATTTAGGTATTTGAGTTGGTAAT  
AGTAGTTTTTTTTTGGGTTTTTTTTTTTTTGTATGGGAGTTGTTTT

### Note:

1. Underline indicates the sequences of primers binding.
2. Restriction enzyme Acl I cut at AACGTT, the second CpG methylation site.
3. 7 CG sites are indicated as above in gray background.
